# Supplementary material for: Stress and odorant receptor feedback during a critical period after hatching regulates olfactory sensory neuron differentiation in Drosophila
Source: PLoS Biol. 2021 Apr 1;19(4):e3001101. doi: 10.1371/journal.pbio.3001101 (PMC8043390; doi:10.1371/journal.pbio.3001101)
Supplement: S1 Data — (XLSX) [file pbio.3001101.s002.xlsx]

## Sheet: ORs
gene id	symbol	level 1 DPE	level 4 DPE	level 14 DPE	fold change 4/1 DPE	p-value 4/1 DPE	fold change 4/14 DPE	p-value 4/1 DPE
FBgn0023523	Or2a	0.642	0.85	1.03	0.618	0.02	0.82	0.0247
FBgn0030016	Or7a	1.29	1.56	1.74	0.741	3.24e-09	0.715	2.97e-06
FBgn0030204	Or9a	1.43	1.69	1.85	0.707	8.13e-10	0.68	0.000829
FBgn0030715	Or13a	1.22	1.47	1.37	0.666	6.62e-07	-0.224	0.244
FBgn0041626	Or19a	0.183	0.427	0.71	1.51	0.0058	1.62	0.018
FBgn0062565	Or19b	0.544	0.984	0.945	1.63	6.71e-10	-0.0226	0.946
FBgn0026398	Or22a	1.26	1.55	1.63	0.736	2.22e-07	0.469	0.105
FBgn0026397	Or22b	1.65	2.07	2.11	1.2	3.44e-43	0.253	0.0264
FBgn0026395	Or23a	0.765	0.897	1.01	0.328	0.222	0.623	0.223
FBgn0026392	Or33a	0.401	0.665	0.572	0.985	0.0066	-0.288	0.544
FBgn0028946	Or35a	1.25	1.56	1.5	0.792	9.37e-08	-0.0506	0.802
FBgn0033043	Or42b	1.98	2.05	2.12	-0.00316	0.969	0.373	0.0292
FBgn0026389	Or43a	0.916	1.53	1.57	1.9	6.35e-35	0.31	0.2
FBgn0026393	Or43b	1.19	1.62	1.58	1.29	2.21e-27	-0.00937	0.954
FBgn0026386	Or47a	1.45	1.69	1.71	0.572	6e-08	0.198	0.209
FBgn0026385	Or47b	1.47	2.06	1.97	1.77	2.21e-82	-0.148	0.359
FBgn0028963	Or49b	0.935	1.18	1.02	0.676	0.000202	-0.437	0.118
FBgn0034473	Or56a	1.4	1.58	1.57	0.419	0.000358	0.0844	0.611
FBgn0034865	Or59b	1.79	2.21	2.28	1.2	1.38e-35	0.376	0.0105
FBgn0041625	Or65a	0.991	1.17	0.98	0.421	0.0272	-0.371	0.443
FBgn0041624	Or65b	0.968	1.22	1.04	0.671	0.000115	-0.387	0.324
FBgn0041623	Or65c	0.55	0.599	0.676	0.124	0.748	0.824	0.307
FBgn0036009	Or67a	1.27	1.48	1.53	0.483	0.0013	0.312	0.221
FBgn0036019	Or67b	0.861	1.18	1.06	0.985	1.87e-07	-0.313	0.258
FBgn0036078	Or67c	1.01	1.34	1.22	0.968	2.57e-10	-0.29	0.18
FBgn0036080	Or67d	1.38	1.82	1.7	1.26	4e-27	-0.287	0.0757
FBgn0041622	Or69a	1.02	1.04	1	-0.162	0.401	0.0513	0.897
FBgn0041621	Or82a	1.03	1.24	1.22	0.552	0.00404	0.0507	0.874
FBgn0037399	Or83c	0.746	1.15	1.05	1.32	3.2e-10	-0.244	0.397
FBgn0037576	Or85a	1.13	1.35	1.29	0.544	0.000159	-0.0637	0.799
FBgn0037590	Or85b	1.23	1.55	1.55	0.861	3.2e-12	0.149	0.499
FBgn0037685	Or85f	0.819	1.01	0.902	0.471	0.0277	-0.268	0.381
FBgn0038798	Or92a	1.95	2.25	2.2	0.772	8.27e-28	-0.00662	0.975
FBgn0039551	Or98a	1.05	1.37	1.36	0.898	2.34e-08	0.168	0.609
FBgn0037324	Orco	2.83	3.29	3.33	1.29	7.45e-106	0.272	0.0499

## Sheet: GRs
gene id	symbol	level 1 DPE	level 4 DPE	level 14 DPE	fold change 4/1 DPE	p-value 4/1 DPE	fold change 4/14 DPE	p-value 4/1 DPE
FBgn0041250	Gr21a	1.45	1.64	1.6	0.436	0.000355	-0.0161	0.924
FBgn0041247	Gr28a	0.154	0.52	0.168	2.16	3.2e-05	-2.02	0.024
FBgn0045495	Gr28b	0.984	1.01	0.996	-0.169	0.44	0.0818	0.805
FBgn0264556	Gr39a	0.323	0.731	0.453	1.7	1.08e-05	-1.09	0.0558
FBgn0041243	Gr43a	0.325	0.744	0.722	1.76	7.77e-07	0.193	0.726
FBgn0035167	Gr61a	0.328	0.586	0.462	1.14	0.00511	-0.261	0.721
FBgn0035468	Gr63a	1.88	1.83	1.8	-0.405	5.04e-06	0.0623	0.747
FBgn0045479	Gr64a	0.334	0.603	0.607	1.24	0.00341	0.12	0.839
FBgn0052255	Gr64f	0.912	1.55	1.59	2.03	1.59e-45	0.291	0.212
FBgn0041229	Gr93a	0.523	0.822	0.729	1.06	0.000337	-0.276	0.475

## Sheet: IRs
gene id	symbol	level 1 DPE	level 4 DPE	level 14 DPE	fold change 4/1 DPE	p-value 4/1 DPE	fold change 4/14 DPE	p-value 4/1 DPE
FBgn0031209	Ir21a	0.438	0.682	0.535	0.84	0.0232	-0.526	0.251
FBgn0031634	Ir25a	1.93	2.47	2.47	1.57	1.48e-119	0.135	0.231
FBgn0051718	Ir31a	1.52	1.63	1.45	0.133	0.255	-0.407	0.145
FBgn0259683	Ir40a	1.34	1.78	1.71	1.26	6.57e-32	-0.101	0.551
FBgn0040849	Ir41a	0.714	1.1	0.946	1.24	4.95e-09	-0.418	0.15
FBgn0050081	Ir51b	0.419	0.776	0.703	1.38	0.000245	-0.234	0.65
FBgn0034994	Ir60a	0.986	0.591	0.631	-1.8	1.88e-10	0.305	0.546
FBgn0053971	Ir62a	0.749	1.08	0.967	1.08	9.91e-06	-0.307	0.415
FBgn0035604	Ir64a	1.64	2.02	1.94	1.07	6.07e-35	-0.117	0.393
FBgn0036757	Ir75a	1.63	2.03	2.1	1.12	3.66e-40	0.379	0.00108
FBgn0261402	Ir75b	1.21	1.59	1.7	1.11	2.16e-17	0.514	0.0146
FBgn0261401	Ir75c	0.953	1.32	1.43	1.11	1.23e-10	0.513	0.038
FBgn0036829	Ir75d	0.83	1.08	1.1	0.689	0.000573	0.214	0.386
FBgn0260874	Ir76a	1.31	1.66	1.59	0.991	6.89e-18	-0.0997	0.556
FBgn0036937	Ir76b	1.69	2.32	2.31	1.89	1.96e-92	0.144	0.446
FBgn0037501	Ir84a	0.914	1.32	1.28	1.3	6.6e-11	-5.29e-05	1
FBgn0052704	Ir8a	1.53	2.1	2.17	1.74	8.47e-58	0.349	0.00796
FBgn0038789	Ir92a	0.803	1.18	1.14	1.23	4.9e-10	-0.0181	0.951
FBgn0259215	Ir93a	0.779	1.07	0.974	0.923	4.37e-05	-0.237	0.479

## Sheet: synapse genes
gene id	symbol	level 1 DPE	level 4 DPE	level 14 DPE	fold change 4/1 DPE	p-value 4/1 DPE	fold change 4/14 DPE	p-value 4/1 DPE
FBgn0046704	Liprin-alpha	1.77	1.9	1.74	0.218	0.0226	-0.425	0.0039
FBgn0036376	Liprin-beta	1.71	1.78	1.78	0.0224	0.821	0.11	0.451
FBgn0011288	Snap25	2.39	1.58	1.45	-2.94	2.09e-132	-0.349	0.0491
FBgn0004575	Syn	2.28	2.24	2.07	-0.355	9.48e-08	-0.456	0.000291
FBgn0053094	Synd	2.11	2.04	1.97	-0.456	1.8e-09	-0.14	0.25
FBgn0033876	Syngr	2.35	2.3	2.23	-0.397	2.23e-08	-0.0852	0.56
FBgn0034691	Synj	1.89	1.86	1.83	-0.307	0.00344	0.016	0.925
FBgn0004242	Syt1	2.82	2.66	2.48	-0.743	1.45e-32	-0.488	0.00309
FBgn0028400	Syt4	2.41	2.59	2.55	0.401	3.87e-11	-0.0313	0.785
FBgn0039900	Syt7	2.23	2.11	1.9	-0.638	8.66e-10	-0.539	0.0085
FBgn0013343	Syx1A	2.45	2.45	2.23	-0.24	0.0213	-0.538	0.0504
FBgn0259246	brp	2.48	2.43	2.27	-0.386	1.78e-07	-0.412	0.00959
FBgn0266758	Esyt2	1.67	1.67	1.65	-0.22	0.0293	0.13	0.598
FBgn0013342	nSyb	2.85	2.87	2.81	-0.141	0.0109	-0.0998	0.246

## Sheet: Cilia genes
gene id	symbol	level 1 DPE	level 4 DPE	level 14 DPE	fold change 4/1 DPE	p-value 4/1 DPE	fold change 4/14 DPE	p-value 4/1 DPE
FBgn0037989	ATP8B	2.36	2.86	2.73	1.41	2.97e-93	-0.285	0.0062
FBgn0035741	BBS1	0.985	1.43	1.43	1.39	3.74e-18	0.128	0.565
FBgn0033578	BBS4	1.76	2.11	2.12	0.958	7.17e-31	0.152	0.325
FBgn0031255	BBS8	1.34	1.78	1.82	1.29	2.79e-24	0.262	0.127
FBgn0050441	IFT20	0.451	0.436	0.532	-0.419	0.359	0.585	0.317
FBgn0032692	IFT46	1.46	1.82	1.93	0.996	8.25e-21	0.517	0.000224
FBgn0031829	IFT52	1.4	1.73	1.8	0.909	2.31e-18	0.359	0.00779
FBgn0038221	IFT54	1.39	1.73	1.72	0.906	3.75e-18	0.12	0.454
FBgn0004380	Klp64D	1.97	2.11	2.13	0.242	0.00205	0.209	0.0577
FBgn0004381	Klp68D	2.08	2.23	2.27	0.272	0.000135	0.258	0.0128
FBgn0016919	nompB	1.63	1.88	1.81	0.641	1.03e-12	-0.109	0.454
FBgn0265102	Oseg1	1.42	1.74	1.7	0.885	3.78e-16	-0.00316	0.983
FBgn0035317	Oseg2	1.4	2.07	2.07	2.06	3.86e-54	0.113	0.558
FBgn0035264	Oseg4	1.05	1.54	1.63	1.52	7.12e-18	0.427	0.0714
FBgn0032891	Oseg5	1.22	1.58	1.65	1.06	3.56e-15	0.365	0.0705
FBgn0034452	Oseg6	1.4	1.78	1.83	1.08	3.54e-23	0.298	0.0801

## Sheet: OBPs
gene id	symbol	level 1 DPE	level 4 DPE	level 14 DPE	fold change 4/1 DPE	p-value 4/1 DPE	fold change 4/14 DPE	p-value 4/1 DPE
FBgn0030985	Obp18a	1.08	1.03	1.13	-0.395	0.0291	0.459	0.0699
FBgn0031109	Obp19a	3.1	3.35	3.57	0.584	6.18e-29	0.878	1.38e-25
FBgn0031110	Obp19b	1.5	2.29	2.42	2.43	4.74e-164	0.632	0.00821
FBgn0011280	Obp19d	4.24	4.31	4.43	0.0122	0.859	0.533	1.9e-07
FBgn0011283	Obp28a	3.53	3.39	3.64	-0.695	7.26e-34	0.989	4.68e-11
FBgn0050052	Obp49a	1.13	2.34	2.3	3.89	0	0.00146	0.99
FBgn0034468	Obp56a	0.508	1.69	1.88	4.14	5.62e-114	1.06	0.123
FBgn0034470	Obp56d	2.66	3.01	3.04	0.94	1.5e-29	0.368	0.442
FBgn0034474	Obp56g	0.487	1.64	1.67	4.18	1.35e-96	0.3	0.317
FBgn0043535	Obp57a	1.17	1.19	1.32	-0.18	0.317	0.719	0.0802
FBgn0043534	Obp57b	2.15	1.84	1.82	-1.28	5.12e-25	0.0422	0.811
FBgn0034509	Obp57c	2.73	2.24	2.3	-1.86	4.81e-73	0.319	0.0461
FBgn0034766	Obp59a	2.8	2.91	3.11	0.157	0.00449	0.769	2.01e-18
FBgn0011279	Obp69a	3.01	3.15	3.21	0.242	0.016	0.368	0.134
FBgn0011281	Obp83a	3.71	3.89	4.15	0.377	2.47e-10	1.02	8.44e-10
FBgn0010403	Obp83b	3.4	3.77	3.82	0.991	1.97e-19	0.325	0.102
FBgn0011282	Obp84a	1.01	1.29	1.39	0.755	4.76e-06	0.462	0.0365
